# A Proof-Of-Principle Study of Epigenetic Therapy Added to Neoadjuvant Doxorubicin Cyclophosphamide for Locally Advanced Breast Cancer

Claudia Arce<sup>2,3</sup>, Carlos Pérez-Plasencia<sup>1,3</sup>, Aurora González-Fierro<sup>1</sup>, Erick de la Cruz-Hernández<sup>1</sup>, Alma Revilla-Vázquez<sup>3</sup>, Alma Chávez-Blanco<sup>1</sup>, Catalina Trejo-Becerril<sup>1</sup>, Enrique Pérez-Cárdenas<sup>1</sup>, Lucía Taja-Chayeb<sup>1</sup>, Enrique Bargallo<sup>4</sup>, Patricia Villarreal<sup>4</sup>, Teresa Ramírez<sup>4</sup>, Teresa Vela<sup>5</sup>, Myrna Candelaria<sup>2</sup>, María F. Camargo<sup>1</sup>, Elizabeth Robles<sup>2</sup>, Alfonso Dueñas-González<sup>1\*</sup>

1 Unidad de Investigación Biomédica en Cáncer, Instituto de Investigaciones Biomédicas, Universidad Nacional Autónoma de México (UNAM), Instituto Nacional de Cancerología (INCAN), Mexico City, Mexico, 2 División de Investigación Clínica, Instituto Nacional de Cancerología (INCAN), Mexico City, Mexico, 3 Laboratorio de Desarrollo de Métodos Analíticos, FES-Cuautitlán, Universidad Nacional Autónoma de México (UNAM), Cuautitlán-Izcalli, Estado de México, Mexico, 4 Departamento de Tumores Mamarios, Instituto Nacional de Cancerología (INCAN), Mexico City, Mexico, 5 Departamento de Patología, Instituto Nacional de Cancerología (INCAN), Mexico City, Mexico

**Background.** Aberrant DNA methylation and histone deacetylation participate in cancer development and progression; hence, their reversal by inhibitors of DNA methylation and histone deacetylases (HDACs) is at present undergoing clinical testing in cancer therapy. As epigenetic alterations are common to breast cancer, in this proof-of-concept study demethylating hydralazine, plus the HDAC inhibitor magnesium valproate, were added to neoadjuvant doxorubicin and cyclophosphamide in locally advanced breast cancer to assess their safety and biological efficacy. **Methodology.** This was a single-arm interventional trial on breast cancer patients (ClinicalTrials.gov Identifier: NCT00395655). After signing informed consent, patients were typed for acetylator phenotype and then treated with hydralazine at 182 mg for rapid-, or 83 mg for slow-acetylators, and magnesium valproate at 30 mg/kg, starting from day -7 until chemotherapy ended, the latter consisting of four cycles of doxorubicin 60 mg/m<sup>2</sup> and cyclophosphamide 600 mg/m<sup>2</sup> every 21 days. Core-needle biopsies were taken from primary breast tumors at diagnosis and at day 8 of treatment with hydralazine and valproate. **Main Findings.** 16 patients were included and received treatment as planned. All were evaluated for clinical response and toxicity and 15 for pathological response. Treatment was well-tolerated. The most common toxicity was drowsiness grades 1–2. Five (31%) patients had clinical CR and eight (50%) PR for an ORR of 81%. No patient progressed. One of 15 operated patients (6.6%) had pathological CR and 70% had residual disease <3 cm. There was a statistically significant decrease in global 5<sup>m</sup>C content and HDAC activity. Hydralazine and magnesium valproate up- and down-regulated at least 3-fold, 1,091 and 89 genes, respectively. **Conclusions.** Hydralazine and magnesium valproate produce DNA demethylation, HDAC inhibition, and gene reactivation in primary tumors. Doxorubicin and cyclophosphamide treatment is safe, well-tolerated, and appears to increase the efficacy of chemotherapy. A randomized phase III study is ongoing to support the efficacy of so-called epigenetic or transcriptional cancer therapy.

Citation: Arce C, Pérez-Plasencia C, González-Fierro A, de la Cruz-Hernández E, Revilla-Vázquez A, et al (2006) A Proof-Of-Principle Study of Epigenetic Therapy Added to Neoadjuvant Doxorubicin Cyclophosphamide for Locally Advanced Breast Cancer. PLoS ONE 1(1): e98. doi:10.1371/journal.pone.0000098

## INTRODUCTION

Aberrant gene transcriptions resulting from epigenetic changes are frequent events in the molecular pathogenesis of malignant transformation. DNA hypermethylation and histone deacetylation are critical for determining a closed chromatin structure responsible for or related with aberrant gene transcription in malignancies [1]. In counterpoint to genetic defects, the reversible nature of epigenetic aberrations constitutes an attractive therapeutic target; hence, a number of DNA methylation and histone deacetylase (HDAC) inhibitors are undergoing preclinical testing in combination for cancer therapy because it is clear that these drugs exert a synergistic effect on gene expression [2,3] and tumor growth [4–8]. To date, only a limited number of clinical trials has been reported using both a demethylating and an HDAC inhibitor for treatment of hematological [9] and solid tumors [10]. Interestingly, preclinical reports have underscored that DNA methylation and HDAC inhibitors also possess the ability to potentiate radiation and chemotherapy [11–15]. In addition, it is known that chemotherapy resistance\_either innate or acquired\_requires expression changes in a large number of genes for its development; therefore, it has been hypothesized that epigenetic-mediated changes could be the responsible driving force for chemotherapy resistance; thus, epigenetic therapy has the potential to revert chemotherapy resistance [16].

In breast cancer, there is substantial evidence demonstrating the importance of epigenetic mechanisms in transcriptional regulation of critical tumor suppressor and growth regulatory genes. These genes include those that play crucial roles in DNA repair, cell-

**Academic Editor:** Mikhail Blagosklonny, Ordway Research Institute, Inc., United States of America

**Received** September 13, 2006; **Accepted** October 27, 2006; **Published** December 20, 2006

**Copyright:** © 2006 Arce et al. This is an open-access article distributed under the terms of the Creative Commons Attribution License, which permits unrestricted use, distribution, and reproduction in any medium, provided the original author and source are credited.

**Funding:** This work was supported by CONACyT grants SALUD-2002-C01-6579 and AVANCE C01-294, and by Psicofarma, S.A. de C.V., Mexico. Sponsors did not participate in study design; collection, analysis, and interpretation of data; writing of the paper; nor decision to submit it for publication.

**Competing Interests:** The authors have declared that no competing interests exist.

\* **To whom correspondence should be addressed.** E-mail: alfonso\_duenasg@yahoo.com

☯ These authors contributed equally to this work.

cycle regulation, cell growth, and cell-cell adhesion, which can all contribute to breast cancer tumorigenesis, metastasis, and resistance to therapy [17–20]. Thus, clinical testing of a combination of epigenetic agents together with classical cytotoxic chemotherapy in breast cancer appears desirable.

Primary systemic, neoadjuvant, or preoperative therapy is the standard of care in patients with operable and locally advanced breast cancer [21]. Comparable outcomes have been found for pre- and post-operative administration of various cytotoxic regimens [22,23]; however, pre-operative therapy has the advantage of the assessment of pathological tumor response, which has been correlated with improved survival [24,25]. Additionally, it provides an opportunity to evaluate biological markers after treatment. Therefore, in this proof-of-principle study we intended to evaluate the safety and biological and clinical efficacy of the epigenetic agents hydralazine and magnesium valproate plus neoadjuvant doxorubicin and cyclophosphamide in locally advanced breast cancer.

## METHODS

### Patients

Eligible patients were 18 years of age and older, with histologically proven invasive T2-3, N0-2, and M0 (stages IIB–IIIA) breast carcinoma. Additional eligibility requirements included Eastern Cooperative Oncology Group performance status  $\leq 2$ , absolute leukocyte count  $\geq 4,000/\text{mm}^3$ , platelets  $\geq 100,000/\text{mm}^3$ , hemoglobin  $\geq 9.0$  g/dL, total bilirubin, aspartate amino transferase and alanine amino transferase  $\leq 1.5$  the upper normal limit, creatinine  $\leq 1.2$  mg/dL or a calculated creatinine clearance of  $\geq 60$  mL/min, and written informed consent.

Patients were excluded if they referred a history of allergy to sulfas, hydralazine, or magnesium valproate, past or present condition of rheumatic disease, central nervous system disease, heart failure from aortic stenosis and postural hypotension as diagnosed by a physician, previous use of the experimental drugs, as well as if patients were pregnant or breast-feeding. Other exclusion criteria included uncontrolled systemic disease or infection. The protocol was approved by the Institutional Review Boards of the Instituto Nacional de Cancerología Mexico and carried out in accordance with the Declaration of Helsinki, good clinical practices, and local ethical and legal requirements.

### Treatment plan

Once informed consent was signed, patients received a single oral 500-mg dose (two 250-mg tablets) of sulfamethazine early in the morning, and urine was collected within the ensuing 6 h for acetylator-status phenotyping, which was carried out as reported [26]. Afterward, patients began treatment (day  $-7$ ) with a daily dose of a slow-release formulation of hydralazine tablets containing either 182 mg for rapid-acetylators or 83 mg for slow-acetylators. Magnesium valproate tablets of 700 mg were also administered as a slow-release formulation at a dose of 30 mg/Kb t.i.d. Both hydralazine and magnesium valproate were administered from day  $-7$  until the last day of the fourth chemotherapy cycle.

### Chemotherapy

Chemotherapy consisted of four cycles of doxorubicin 60 mg/m<sup>2</sup> and cyclophosphamide 600 mg/m<sup>2</sup> at day 1 every 21 days. Antiemetic premedication was intravenous (i.v.) dexamethasone 16 mg and ondansetron 16 mg.

### Therapy duration and dose modifications

Patients received hydralazine and magnesium valproate until the last chemotherapy cycle, and were discontinued if the patient was unable to tolerate these despite dose modification, if the patient developed concurrent illness, or if the patient underwent changes in medical condition rendering them unacceptable for further treatment. Chemotherapy administration was delayed for 1 or 2 weeks in the event of any grade 3 or 4 hematological and non-hematological toxicity. In all these cases, however, hydralazine and magnesium valproate were continued. Only the dose of magnesium valproate was reduced 25% for grade 3 drowsiness, and was continued at the reduced level throughout the ensuing chemotherapy treatment. Routine or prophylactic use of colony stimulating factors was not allowed during treatment. Nonetheless, growth factor support was permitted to treat a neutropenic event. If the disease progressed during pre-operative therapy, chemotherapy was discontinued and patients underwent immediate surgery or radiation therapy. After final clinical-response assessment, patients were required to be operated on between 14 and 28 days after the last chemotherapy application. Thereafter, all patients received standard radiotherapy of the remaining breast tissue or to the chest wall. Adjuvant weekly paclitaxel 80 mg/m<sup>2</sup> was administered for 12 weeks in patients with positive nodes after surgery. HER2-positive patients also received adjuvant trastuzumab. Tamoxifen 20 mg/day was administered in estrogen receptor-positive patients.

### Assessment

Baseline work-up included a complete history and physical examination, bilateral mammography and sonography of the breast, chest x-ray, liver ultrasound (US), and bone scintigraphy. Histologically, the tumor was evaluated with Scarff-Bloom-Richardson grading; HER2 and hormone receptors were assayed by immunohistochemistry. Laboratory assessment consisted of complete blood cell count and blood chemistry. Tumor assessment was performed within 2 weeks prior to initiation of transcriptional therapy. Clinical evaluation of palpable tumor and lymph nodes was repeated before each cycle and before surgery.

The primary end-points were to evaluate the safety of cytotoxic chemotherapy associated with hydralazine and magnesium valproate, as well as to evaluate changes in DNA methylation, HDAC inhibition and global gene expression before and after treatment. The secondary end-point was to evaluate clinical and pathological response after the fourth chemotherapy course. Clinical complete response (CR) response was defined as complete disappearance of all tumor signs in the breast and was assessed by both palpation and by the most appropriate imaging method. Partial response (PR) was defined as a reduction in the product of the two largest perpendicular diameters of primary-tumor size by 50% or more. In patients with multifocal or multicentric disease, solely the lesion with the largest diameter was assessed. Stable disease (SD) was defined as no significant increase or decrease in tumor size, and progressive disease was defined as the development of new, previously undetected lesions or  $\geq 25\%$  increase in the size of a pre-existing lesion. Pathological complete response (pCR) was defined as no microscopic evidence of residual viable tumor cells in breast and axillary lymph nodes. Toxicity during chemotherapy was evaluated according to common toxicity criteria (CTC) of National Cancer Institute (NCI) version 2.0.

### Clinical samples

Core-needle biopsies were taken from primary breast tumors at diagnosis and after 7 days of treatment with hydralazine and

magnesium valproate prior to the first course of doxorubicin plus cyclophosphamide. Part of the biopsy was sent to the Institution's Pathology Department for routine hematoxylin and eosin diagnosis. The remaining biopsy specimen was immediately frozen at  $-20^{\circ}\text{C}$  for biological analyses. In addition, a blood sample was drawn from the arm by venipuncture to obtain plasma and the mononuclear cell fraction.

### Nucleic acid extraction

Genomic DNA from tumors and peripheral mononuclear blood cells was obtained with the standard method of proteinase-K digestion and phenol-chloroform extraction. RNA from tumors was obtained using the TriReagent RNA extraction kit (Gibco BRL Grand Island, NY, USA) following manufacturer instructions.

### RT-PCR

Primers for *NDUFA13* were forward 5'aatgcaagaaccaaggcgagtcac3' and reverse 5'agcatgtcctgcttcaccttga3, and for *DAPPER*, these were gcgaagagatgctggtttgt3' and 5'tgagagactcaaggtcgcc3'. Annealing temperatures were 60 and 55°C for 35 cycles. Products were electrophoresed and visualized under ultraviolet (UV) light.

### Global DNA methylation

Quantification of genomic 5-methylcytosine from peripheral blood DNA was performed by capillary electrophoresis, as previously described [27]. Relative methylation of each DNA sample was taken as the percentage of  $^m\text{C}$  in total cytosine:  $^m\text{C}$  peak area  $\times 100 / (\text{C peak area} + ^m\text{C peak area})$ .

### Histone deacetylase assay

Assays were performed using the colorimetric HDAC activity assay from BioVision (BioVision Research Products, Mountain View, CA, USA) according to manufacturer instructions, as described [28].

### Valproic acid plasma levels

Valproic acid was measured in plasma using a fluorescence polarization immunoassay (FPIA) technology, as previously described [28].

### Hydralazine plasma levels

Hydralazine was determined in plasma by high-performance liquid chromatographic (HPLC) assay, as previously described [29].

### Microarray analysis

We used the Amersham (Piscataway, NJ, USA) CodeLink system containing 55,000 gene 30-mer oligonucleotide probes. Target preparation, microarray hybridization, post-hybridization processing and scanning, and normalization were done essentially as described [13]. Gene expression differences induced by epigenetic treatment were analyzed by comparing pre- and post-treated clinical samples versus normal breast serial analysis of gene expression (SAGE) libraries obtained from the SAGE public website. We included only libraries obtained from normal tissues and with a total amount of sequenced tags. Median expression values for each tag were calculated. To avoid errors in matching tag to Unigene cluster, we considered only tags of  $>30,000$  for which a unique Unigene cluster match was found. To reduce redundancy due to different cluster ID-associated tags, we eliminated these repetitive Unigene IDs. Data values for each sample were normalized between the two platforms against the

median of normal breast SAGE libraries, and Log<sub>2</sub>-based expression ratios were obtained. As unsupervised analysis, we performed hierarchical clustering and principal component analyses to group genes and samples on the basis of their similarities in expression as an initial analysis. An average linkage hierarchical-clustering technique was used in which the measurement of similarity was Spearman rank correlation among the samples' transcription profiles. Log<sub>2</sub> expression ratios were filtered to find genes with a 3-fold minimum expression ratio. Hierarchical clustering analyses and principal component analyses were performed by means of the Genesis program [30].

A supervised analysis was also performed to determine genes that were significantly differentially expressed between pre- and post-epigenetic treatment in clinical samples using significance analysis of microarrays. This method involves testing each gene one at a time and then performing 100 permutation tests to estimate the false-discovery rate that arises from input genes [31]. We selected the number of significant genes corresponding to a target false-discovery rate of 0.16.

### Statistical analysis

Comparisons between biological measurements before and after treatment were evaluated by Wilcoxon or unpaired *t* test. Analysis of the comparison between serum levels of hydralazine throughout treatment according to acetylator phenotype was carried out by independent Student *t* test. A *p* value  $<0.05$  was considered significant.

## RESULTS

### Patients

The flow diagram of the trial is shown in Figure 1. Sixteen patients were included in this study. Patient characteristics are listed in Table 1. Mean age was 47 years (range, 38–67 years), 68 and 32% were stages IIIA and IIB, respectively, and median tumor size was 5 cm (range, 3–12 cm). All patients had clinically positive nodes with median nodal size of 2 cm (range, 1–5 cm). The majority of tumors (80%) were ductal carcinomas, and 80% were intermediate- and high-grade tumors; 77% were estrogen receptor-positive and 30% were HER2- positive.

All patients received four cycles of doxorubicin and cyclophosphamide plus hydralazine and magnesium valproate as planned. In addition, all patients were evaluated for clinical response and toxicity, but there were only 15 pathological assessments of the response, as one patient refused surgical treatment. Analysis of DNA methylation, HDAC activity before and after pre-treatment days with hydralazine and magnesium valproate was performed in five patients, whereas only three patients could be analyzed for global expression profiling of tumors. Hydralazine and valproic acid plasma levels were measured at several points during the protocol.

### Clinical Response

The sixteen patients were evaluable for clinical response. Five (31%) patients had complete response and eight (50%), partial response, for an overall response rate of 81%. Three patients had stable disease and none progressed (Table 2).

### Pathological Response

Fifteen patients underwent surgery. One patient (6.6%) had pathological complete response. However, in 70% of cases residual disease was  $<3$  cm, 33% of cases had pathological negative lymph nodes, and no case had extranodal extension (Table 2).

## Flow diagram of the trial

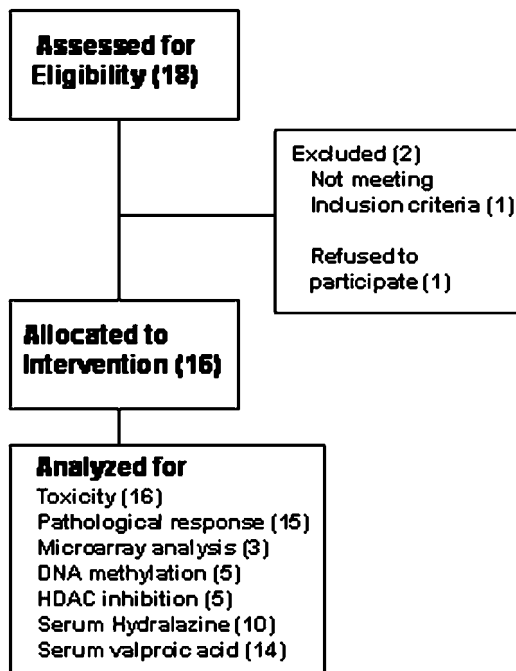

Figure 1. Flow diagram of the trial.  
doi:10.1371/journal.pone.0000098.g001

### Toxicity

The treatment was well-tolerated in general. All patients received four cycles of pre-operative chemotherapy; in total, 64 cycles were administered. Hematological toxicity was the most common side effect, neutropenia grade 3/4 observed in 35% of cases and anemia grade 3/4 in 15% of cases. No episodes of grade 3/4 thrombocytopenia were registered. Only two patients presented febrile neutropenia. No toxic deaths were registered. Regarding non-hematological toxicity, drowsiness was the most frequent side-effect; it was observed in 31% of cycles, nonetheless in the vast majority, of grade 1 severity. Other side effects were tremor, edema, fatigue, nausea/vomiting, and headache, mainly grades 1 and 2 (Table 3).

### DNA Methylation

Global DNA methylation was assessed by capillary electrophoresis in DNA extracted from the peripheral blood of five patients. The results show in all cases a significant reduction in  $5^mC$  content, varying from 0.7–2.59% decrease. Mean  $5^mC$  in the five pre-treatment samples was 5.71% (standard deviation [SD], 1.43), which decreased to 4.2% (SD, 0.95). This difference was statistically significant ( $p = 0.043$ ) (Figure 2).

### Histone Deacetylase Activity

HDAC enzymatic activity was tested in protein extracts from the peripheral blood of five patients. As shown in Figure 3, there was a reduction in enzymatic activity in these five patients as determined by optical density (OD)-unit absolute values. Higher and lower decreases were 0.3845 and 0.0175, for a mean decrease of 0.1624. This difference was statistically significant ( $p = 0.042$ ).

Table 1. Clinicopathological characteristics

| Variable                 | Number (%) |
|--------------------------|------------|
| Age (median)             | 47 (38–67) |
| Staging (TNM)            |            |
| IIB                      | 5 (31.3)   |
| IIIA                     | 11 (68.7)  |
| Histology                |            |
| Ductal                   | 14 (87.5)  |
| Lobullillar              | 1 (6.3)    |
| Mixed                    | 1 (6.3)    |
| Tumor size               |            |
| Median                   | 5 cm       |
| Range                    | 3–12 cm    |
| Histological grade       |            |
| 1                        | 1 (6.3)    |
| 2                        | 8 (40)     |
| 3                        | 7 (47.4)   |
| Lympho-vascular invasion |            |
| Present                  | 5 (31.3)   |
| Absent                   | 11 (68.7)  |
| Estrogen Receptor        |            |
| Positive                 | 11 (68.7)  |
| Negative                 | 5 (31.3)   |
| HER2 (Herceptest ++/+++) |            |
| Positive                 | 4 (25)     |
| Negative                 | 12 (75)    |
| Menopause status         |            |
| Pre-menopause            | 9 (56)     |
| Post-menopause           | 7 (44)     |
| Node status (TNM)        |            |
| N1                       | 9 (56)     |
| N2                       | 7 (44)     |
| Node size                |            |
| Median                   | 2 cm       |
| Range                    | 1–5 cm     |

doi:10.1371/journal.pone.0000098.t001

Table 2. Response to treatment

| Clinical Response     | Number | %     |
|-----------------------|--------|-------|
| Complete              | 5      | 31.2% |
| Partial               | 8      | 50%   |
| Stable                | 3      | 18.8% |
| Progression           | 0      | 0%    |
| Overall               | 11     | 81.2% |
| Pathological response |        |       |
| Complete              | 1      | 6.6%  |
| Residual <3 cm        | 11     | 73.3% |
| Residual >3 cm        | 3      | 20%   |

There were 16 and 15 patients who were evaluable for clinical and pathological response, respectively.

doi:10.1371/journal.pone.0000098.t002

**Table 3.** Toxicity of treatment from a total of 64 chemotherapy courses in the 16 patients

| Toxicity         | Grade 1    | Grade 2    | Grade 3  | Grade 4  |
|------------------|------------|------------|----------|----------|
| Drowsiness       | 16 (25%)   | 3 (4.6%)   | 1 (1.5%) | 0        |
| Tremor           | 2 (3.1%)   | 0          | 2 (3.1%) | 0        |
| Edema            | 6 (9.3%)   | 0          | 0        | 0        |
| Fatigue          | 7 (10.9%)  | 2 (3.1%)   | 0        | 0        |
| Nausea/vomiting  | 16 (25%)   | 3 (4.6%)   | 1 (1.5%) | 0        |
| Headache         | 5 (7.8%)   | 3 (4.6%)   | 0        | 0        |
| Anorexia         | 2 (3.1%)   | 0          | 0        | 0        |
| Diarrhea         | 0          | 2 (3.1%)   | 0        | 0        |
| Anemia           | 3 (4.6%)   | 8 (12.5%)  | 2 (3.1%) | 0        |
| Neutropenia      | 10 (15.6%) | 15 (23.4%) | 9 (14%)  | 5 (7.8%) |
| Thrombocytopenia | 0          | 1 (1.5%)   | 0        | 0        |

doi:10.1371/journal.pone.0000098.t003

### Valproic Acid Levels

Plasma samples for measuring valproic acid concentration throughout treatment were available for 14 patients. Mean concentrations varied from 78.5  $\mu\text{g/mL}$ –100.3  $\mu\text{g/mL}$ , for an overall mean of 87.5  $\mu\text{g/mL}$ . There was a continuous decrease in mean concentrations from the beginning to the end of treatment; nevertheless, the sole statistically significant difference was observed when first and the last determinations were compared ( $p = 0.0118$ ) (Table 4).

### Hydralazine Plasma Levels

Plasmatic levels of hydralazine were analyzed in 10 patients in whom plasma samples were available at different time-points during treatment. Distribution of these patients according to acetylator phenotype was four and six for slow and rapid, respectively. Mean plasma levels of hydralazine ranged from 204.8–275.1 ng/mL for rapid-acetylators, whereas these mean values were 252.1–344.2 ng/mL in slow-acetylators. Overall means were 246 and 299 ng/mL, respectively, which were not statistically significant different ( $p = 0.2445$ ) (Table 5).

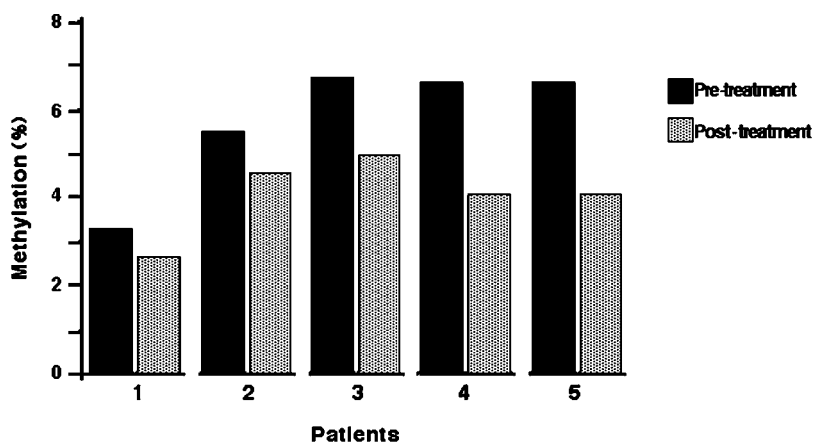

**Figure 2. Global DNA methylation.** The five patients had a reduction in 5mC content varying from 0.7–2.59% decrease. The mean 5mC in the five pre-treatment samples was 5.71% (standard deviation [SD], 1.43) which decreased to 4.2% (SD, 0.95). This difference was statistically significant ( $p = 0.043$ ).

doi:10.1371/journal.pone.0000098.g002

### Gene Expression

A total of 3,117 genes were found up and down-regulated in clinical samples as compared with normal breast tissue. Figure 4 shows cluster analysis of microarray data. As can be observed, expression profile of post-treatment samples cluster together. This was also shown in a principal component analysis, which is an exploratory multivariate statistical technique that allows identification of variables in a multidimensional data set that explains differences or similarities between observations better than hierarchical clustering (Figure 5). With regard to changes in global gene expression observed after hydralazine and valproate treatment, the pre-treatment sample was compared against three post-treatment samples (GEO accession number GSE6304). The number of genes up- or down-regulated by an at least 3-fold difference was 1,091 and 89, respectively (Tables S1 and S2). Table 6 lists some selected genes found up- and down-regulated after treatment. To further assess the up-regulating effect of hydralazine and magnesium valproate, *NDUFA13* and *DRAPER* gene expression was assessed by RT-PCR in the single patient in whom RNA from pre- and post-treatment biopsies was available. As expected, expression of these genes was reactivated (Figure 6).

### DISCUSSION

The idea of treating cancer patients with agents able to re-establish expression of tumor suppressor genes silenced by epigenetic mechanisms is currently being tested. Clinical trials using a combination of DNA methylation and HDAC inhibitors have already shown promising results in hematological neoplasms [9,10]. Here we report on the safety and the biological and clinical efficacy of hydralazine and magnesium valproate added to doxorubicin cyclophosphamide for neoadjuvant treatment of locally advanced breast cancer.

The results of this proof-of-principle study demonstrate that this therapy is safe, that it achieves the molecular changes expected from use of a demethylating and an HDAC inhibitor and appear to increase the efficacy of conventional cytotoxic agents.

Patients entering the study had IIB- and IIIA-stage disease with median tumor size and median axillary nodal sizes of 5 and 2 cm, respectively. Despite this, we observed clinical complete response in five (31.2%) patients, for an overall response rate of 81%. This rate is in the upper limit of response rates observed across multiple

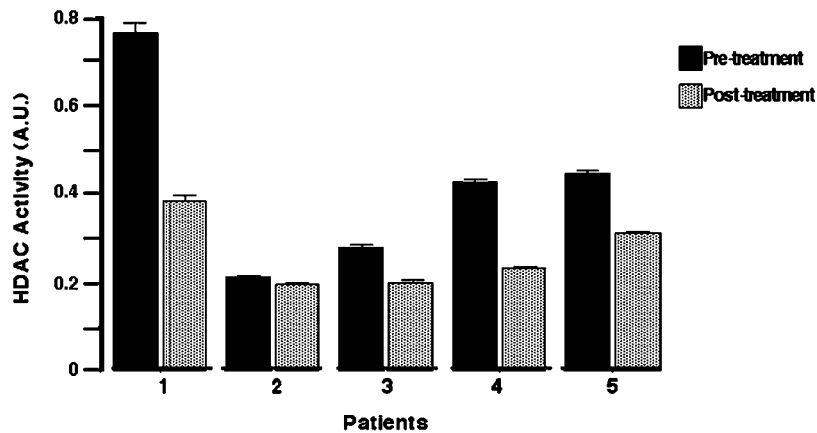

**Figure 3. Histone deacetylase activity.** The five patients assayed showed a reduction in enzymatic activity. In Y axis are the absolute values in optical density (OD) units. Higher and lower decreases were 0.3845 and 0.0175, for a mean decrease of 0.1624. This difference was statistically significant ( $p=0.042$ ). doi:10.1371/journal.pone.0000098.g003

trials according to a recent meta-analysis that reports overall responses between 45 and 83% [32]. Regarding the pathological response, only one of 15 patients (6.6%) achieved complete response. This response rate is, nonetheless, within the range expected from four cycles of anthracyclin-based chemotherapy with rates varying between 3 and 16% [23,25,33–38]. Notwithstanding this, we have no historical control at our Institution treated with this regimen to better assess whether addition of hydralazine and magnesium valproate increased the response. Nevertheless, a recent study in patients with breast cancer treated with anthracyclin-based neoadjuvant chemotherapy at a Mexican institution reports 7% and 45% complete and partial responses, respectively, none pathological complete [39]. Regarding the response in axillary nodes at treatment initiation, all patients had clinically positive nodes, while after therapy we found only 10 patients with pathologically axillary nodes involved. In this regard, Rouzier et al. recently reported on 152 patients with T1–3 breast cancer and positive axillary nodes. After neoadjuvant chemotherapy, 23% had complete disease eradication in axillary lymph nodes [40]. In the present study, axillary pathological complete response rate was 33%; however, no cytological confirmation of pre-treatment status was performed in our study.

Recently, a nomogram based on clinical stage, estrogen receptor status, histological grade, and number of pre-operative chemotherapy cycles that had good discrimination and calibration in training and anthracyclin-treated validation sets has become available to the public [41]. To obtain further information on the usefulness of our treatment protocol, data of the 15 patients were entered into the nomogram, and we found that predicted pathological complete response rate for our patients was 12%, whereas the actual rate observed was 6.6%. Nonetheless, the probability of achieving a pathological residual  $<3$  cm as

**Table 4. Plasmatic levels of valproic acid in  $\mu\text{g}/\text{mL}$**

|      | Day 8 | Cycle 21 | Cycle 2 | Cycle 3 | Cycle 4 | Overall |
|------|-------|----------|---------|---------|---------|---------|
| Mean | 100.3 | 96.9     | 86.9    | 81.8    | 78.1    | 87.5    |
| SD   | 20.1  | 21.8     | 24.0    | 19.5    | 23.1    | 22.6    |

Determinations were taken in 14 patients. The difference between the first and fourth mean concentrations was statistically significant ( $p=0.0118$ ). SD, standard deviation.

doi:10.1371/journal.pone.0000098.t004

predicted from the nomogram was 39%, but the observed rate was 73.3%. These results suggest that the addition of hydralazine and magnesium valproate to the four doxorubicin-cyclophosphamide cycles may have increased probability of response.

Regarding the safety of cytotoxic chemotherapy-associated hydralazine and magnesium valproate, this treatment was well-tolerated. The only toxicity that could be attributed to the experimental therapy specifically, to valproate was drowsiness in the majority of patients; however, this was grades 1 and 2, which by definition do not interfere with patient functioning in daily living. Only one patient presented grade-3 drowsiness. Regarding hydralazine, we observed headache and leg edema but no flushing, hypotension, palpitation, tachycardia, dizziness, or angina pectoris, which comprise hydralazine's cardiovascular effects. The lack of minor side effects produced by these drugs can be at least partly due to the slow-release formulation that avoids hydralazine plasma peaks. Hematological toxicity was within ranges reported by anthracyclin-based schemas, with no grade 3/4 thrombocytopenia, and 15% grade 3/4 anemia; nevertheless, we observed grade 3/4 neutropenia in 35% of cases, which appears to be higher than that reported by other authors [23,25,33–38]. Valproic acid is known to induce trilineage hematological toxicity [42] and to increase the hematological toxicity of a regimen containing fotemustine and cisplatin [43]; nonetheless, it has also been reported that this drug stimulates hematopoietic stem cell proliferation and self-renewal [44]. Whether or not the combina-

**Table 5. Hydralazine plasmatic levels according to the acetylator phenotype (ng/mL)**

| RAPID |       |         |         |         |         |         |
|-------|-------|---------|---------|---------|---------|---------|
|       | Day 8 | Cycle 1 | Cycle 2 | Cycle 3 | Cycle 4 | Overall |
| Mean  | 204.8 | 229.3   | 266.1   | 192.5   | 275.1   | 246.0   |
| SD    | 135.0 | 133.4   | 160.5   | 110.5   | 176.9   | 126.7   |
| SLOW  |       |         |         |         |         |         |
|       | Day 8 | Cycle 1 | Cycle 2 | Cycle 3 | Cycle 4 | Overall |
| Mean  | 344.2 | 298.3   | 252.1   | 335.1   | 287.0   | 299.2   |
| SD    | 34.3  | 64.0    | 154.3   | 169.8   | 193.8   | 132.0   |

Determinations taken in 10 patients. Four were slow and six were rapid acetylators. SD, standard deviation.

doi:10.1371/journal.pone.0000098.t005



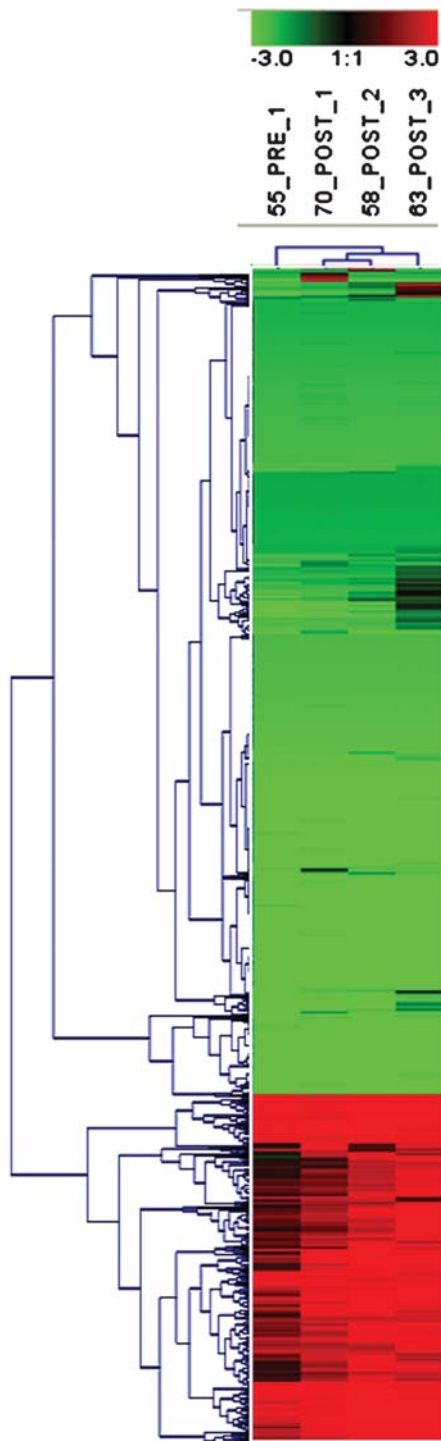

**Figure 4. Hierarchical Cluster Analysis.** The cluster shown represents 3,117 genes. Each row represents a gene, whereas each column corresponds to a tissue sample. The relative abundance of the gene in the tissue correlates with color intensity (red, induced; green, repressed; black, no change). On the dendrogram, post-treated clinical samples clustered together.  
doi:10.1371/journal.pone.0000098.g004

tion of hydralazine and valproate potentiated chemotherapy-induced myelosuppression needs to be further evaluated.

Regarding plasmatic levels achieved with the treatment, it is remarkable that the hydralazine levels achieved were nearly 3-fold

higher than those commonly observed when hydralazine is used as an antihypertensive [45]. In our previous phase I study using hydralazine at doses between 50 and 150 mg/day without accounting for acetylator phenotype, we observed demethylating and reactivating effects [46]; hence, the levels observed herein readily explain the molecular changes observed regarding methylation and gene expression. In this regard, pharmacokinetic characterization in healthy volunteers of the slow-release hydralazine formulation employed in this study (unpublished data) demonstrated AUC concentrations of 6,034+1,899 ng/h/mL and 2,751+954 ng/h/mL for slow- and rapid-acetylators, respectively, using 182 mg regardless of acetylator status. It is noteworthy that the dose adjustment we chose of 182 mg/day and 83 mg/day for rapid- and slow-acetylators, respectively, was adequate, because no statistically significant differences were found in hydralazine plasmatic levels between both types of patients (means, 246 and 249 ng/mL, respectively). With respect to valproic acid levels, we found a mean concentration of 87.5  $\mu$ g/mL, which is within ranges observed in our previous phase I study demonstrating histone hyperacetylation and HDAC inhibition, in which mean concentrations observed were 94.06  $\mu$ g/mL, 123.46  $\mu$ g/mL, and 90.93  $\mu$ g/mL for dose levels of 20, 30, and 40 mg/kg, respectively. Plasma levels progressively decreased until the end of treatment. However, the mean value in the lowest (four-cycle) determination was >75  $\mu$ g/mL, which is an effective concentration [28].

There is a very large number of *in vitro* studies demonstrating global and gene-promoter DNA hypomethylation after treatment with nucleoside analogs, principally 5-azacytidine and 5-aza-2-deoxyazacytidine [46]. Interestingly, this hypomethylating effect has also been achieved in a number of clinical trials employing these agents in hematological malignancies; in fact, measurement of this biological effect constitutes a surrogate marker for the activity of these agents [47]. The same has been observed regarding H3 and H4 histone hyperacetylation and/or inhibition of HDAC activity by a number of agents including valproic acid [48]. Here, we confirmed our *in vitro* [49,50] and clinical observations [51] that hydralazine is an effective DNA methylation inhibitor that led to a statistically significant reduction in the percentage of 5<sup>m</sup>C content in peripheral mononuclear cells after 7 days of treatment. Interestingly, the hypomethylating effect appears higher, or at least similar, to that achieved by 5-aza-2-deoxyazacytidine when evaluated by a related quantitative HPLC-based assay after 7 days of continuous infusion [52]. Other authors have also demonstrated the ability of hydralazine to hypomethylate DNA in other experimental systems [2006, ASCO Procc Abstr 13131], as well as in a clinical setting. Zafar et al. have shown that hydralazine used together with neoadjuvant chemotherapy decreases DNA methylation in primary tumors of patients with breast cancer [2006, AACR Procc 2006 Abstr 41].

On the other hand, the ability of valproic acid to hyperacetylate H3 and H4 histones and to inhibit HDAC has been also demonstrated in the peripheral blood of patients with hematological neoplasms [10,9]. Despite this, it is not totally clear whether histone hyperacetylation is the sole mechanism for explaining its antitumor effects; *in vitro* studies have demonstrated a good correlation between these phenomena [54]. Our findings of a significant decrease in histone acetylase activity as measured by an ELISA assay in five of five patients further support the clinical use of this agent.

A number of pre-clinical studies have consistently demonstrated that DNA demethylating agents and HDAC inhibitors, either alone or in combination, are able to modulate the expression of a number of genes in ranges varying from 0.5–12% [55,56], and

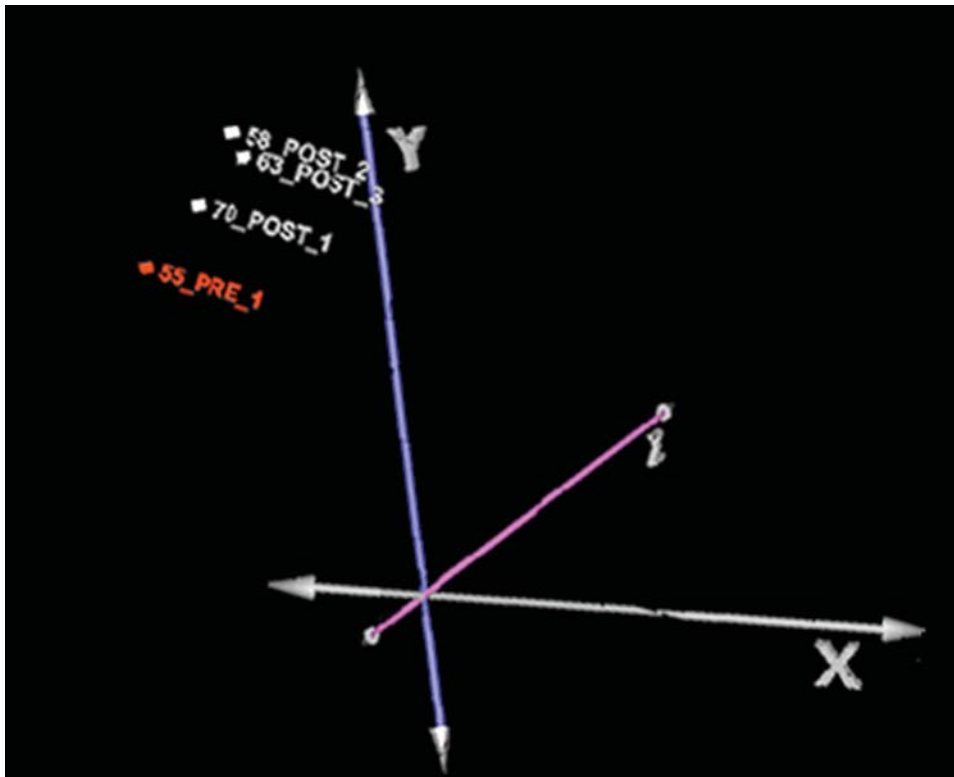

**Figure 5. Principal Component Analysis.** Principal Component Analysis, showing in three-dimensional space relationship between samples. doi:10.1371/journal.pone.0000098.g005

that both classes of agents synergize not only the antitumor effects [4–8], but also the extent of gene up-regulation [2,3]. We recently confirmed this synergy between hydralazine and valproic acid regarding global gene expression by studying colon carcinoma cell line SW480, in which hydralazine and valproic acid led to up-regulation of 153 and 178 genes, respectively, whereas the number of up-regulated genes increased to 352 when used in combination [13]. These data led us to evaluate gene-expression changes at a global level by use of the CodeLink microarray system after 7 days of treatment with this combination of epigenetic agents. Despite that we could only evaluate three patients, among whom only one yielded sufficient RNA in the pre-treatment sample, our data clearly demonstrated the ability of these agents to up-regulate 1,091 genes and to down-regulate 89. As this is the first study evaluating the effect of epigenetic therapy in solid tumors with this methodology, we have no means of comparison with similar studies; nonetheless, it is remarkable that the extent of up-regulation falls well within that expected from *in vitro* experiments of global expression, including that performed by our group with the same method of analysis [13]. It should also be noted that in two microarray studies performed in primary breast-tumor samples before and after 24–72 h after chemotherapy, the up-regulated number of genes is ca 20% of those observed in our study [57,58]. These data, along with our findings of significant DNA hypomethylation and HDAC inhibition, strongly indicate that hydralazine and magnesium valproate up-regulate the expression of a significant number of genes in a clinical scenario. Another supportive finding on their reactivating activity was the unexpected observation that the three post-treatment samples cluster together (Figures 4 and 5) when the four samples were compared with gene expression of normal breast.

Regarding the nature of gene-expression changes, Table 6 list selected genes that showed expression changes (the full list is supplied as Supporting Information). The data are quite interesting and we emphasize the effect observed in tumor suppressor gene p53. Hydralazine and magnesium valproate induced 7.7-fold p53 expression, which confirms that HDACs can up-regulate p53 gene transcription, as demonstrated with depsipeptide and trichostatin A [59,60]. Moreover, it has been shown that p53 induction by HDAC inhibitors may completely deplete mutant p53, and such a sudden restoration is highly cytotoxic to cells harboring mutant p53 [59]. On the other hand, the induction of functional p53 induced by depsipeptide sensitizes SW-1736 cells to doxorubicin [60]. The modulation of this gene for therapeutic aims can be better highlighted from studies using

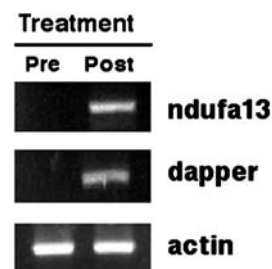

**Figure 6. Gene expression by RT-PCR.** RT-PCR of NDUFA13 and DAPPER genes in biopsies from the primary tumor showing that these genes were reactivated after treatment. This corresponds to one of the three patients whose biopsy (only post-treatment) was analyzed by microarray and showed over-expression of these genes. doi:10.1371/journal.pone.0000098.g006



**Table 6.** Selected up-regulated genes

| Gene nomenclature                                                  | Symbol        | Fold up-regulated          |
|--------------------------------------------------------------------|---------------|----------------------------|
| Tumor protein p53 (Li-Fraumeni syndrome)                           | TP53          | 7.76739051                 |
| NADH dehydrogenase (ubiquinone) 1 alpha subcomplex, 13             | NDUFA13       | 8.35606086                 |
| NADH dehydrogenase (ubiquinone) 1 alpha subcomplex, 3, 9 kDa       | NDUFA3        | 8.10452144                 |
| NADH dehydrogenase (ubiquinone) Fe-S protein 5, 15 kDa             | NDUF55        | 8.09082978                 |
| NADH dehydrogenase (ubiquinone) 1 alpha subcomplex, 1, 7.5 kDa     | NDUFA1        | 8.08146401                 |
| NADH dehydrogenase (ubiquinone) 1 beta subcomplex, 1, 7 kDa        | NDUFB1        | 8.08030825                 |
| NADH dehydrogenase (ubiquinone) 1 alpha subcomplex, 5, 13 kDa      | NDUFA5        | 8.04508688                 |
| NADH dehydrogenase (ubiquinone) 1 beta subcomplex, 10, 22 kDa      | NDUFB10       | 7.923889                   |
| NADH dehydrogenase (ubiquinone) 1 beta subcomplex, 2, 8 kDa        | NDUFB2        | 7.86803475                 |
| NADH dehydrogenase (ubiquinone) 1 alpha subcomplex, 6, 14 kDa      | NDUFA6        | 7.86404551                 |
| Ubiquinol-cytochrome c reductase, complex III subunit VII, 9.5 kDa | UQCRCQ        | 11.5153711                 |
| Cytochrome b5 reductase 3                                          | CYB5R3        | 6.3771685                  |
| Ubiquinol-cytochrome c reductase binding protein                   | UQCRCB        | 5.25097865                 |
| Cytochrome P450, family 4, subfamily Z, polypeptide 1              | CYP4Z1        | 3.95720644                 |
| Cytochrome c oxidase subunit VIc                                   | COX7C         | 3.54327802                 |
| Cytochrome c oxidase subunit VIb polypeptide 1 (ubiquitous)        | COX6B1        | 3.24018981                 |
| Cytochrome P450, family 4, subfamily X, polypeptide 1              | CYP4X1        | 2.62403203                 |
| Cytochrome b5 reductase 1                                          | CYB5R1        | 2.35704124                 |
| Cytochrome P450, family 2, subfamily A, polypeptide 7              | CYP2A7        | 2.28545699                 |
| Major histocompatibility complex, class I, A                       | HLA-A         | 8.28725704                 |
| Major histocompatibility complex, class II, DO beta                | HLA-DOB       | 8.06028024                 |
| Major histocompatibility complex, class I, B                       | HLA-B         | 8.02382794                 |
| Interferon-induced transmembrane protein 2 (1–8D)                  | IFITM2        | 8.01432864                 |
| Interferon-related developmental regulator 1                       | IFRD1         | 7.98237098                 |
| Interferon regulatory factor 7                                     | IRF7          | 7.83758943                 |
| Non-metastatic cells 1, protein (NM23A) expressed in               | NME1          | 7.8821744                  |
| <b>Gene nomenclature</b>                                           | <b>Symbol</b> | <b>Fold down-regulated</b> |
| ATP-binding cassette, sub-family B (MDR/TAP), member 5             | ABCB5         | –6.072                     |

doi:10.1371/journal.pone.0000098.t006

short peptides to rescue its function [61], as well as their local delivery into tumors by viral vectors, as in a recent study that demonstrated its potential to increase chemotherapy effects in patients with breast cancer [62]. On the other hand, we observed over-expression of IFN-response pathway genes, which have been found consistently up-regulated by epigenetic drugs in a number of experimental systems and which increase recombinant interferon-alpha cytotoxicity [63]. Likewise, epigenetic agents have also been shown to up-regulate class-I molecules of the major human histocompatibility complex [64]. Here we show that hydralazine and magnesium valproate led to a >8-fold up-regulation in class-I A and -B molecules. This may also have sound therapeutical implications in the treatment of cancer. A well-known mechanism that tumors utilize to evade antitumor host-response comprises the transcriptional silencing of molecules of the tumor recognition complex, such as class-I molecules [64]. In fact, a recent clinical study on renal cancer and melanoma utilizing a DNA methylation inhibitor along with high-dose interleukin-2 achieved encouraging response rates attributed to facilitation of the immune response against the tumor [65]. In this regard, we have gathered data (submitted for publication) that hydralazine and valproate not only up-regulate HLA-class-I molecules, but also tumor-associated MAGE- and GAGE-family antigens in cervical cancer-cell lines,

which increases the immune recognition and killing of these cervical cancer-cell lines by HPV peptide-stimulated autologous T cells. Additionally of note is up-regulation of the antimetastatic gene product NM23, which is frequently methylated and silenced in patients with breast cancer [66].

At least but not in the least we were surprised by large number of up-regulated genes belonging to the mitochondrial oxidative phosphorylation (OXPHOS) system, with a total of 18 members, the majority of these from complex I. The OXPHOS system consists of five multiprotein complexes, the individual subunits of which are encoded either by the mitochondrial or by the nuclear genome. Defects in the OXPHOS system result in devastating diseases, and in recent years its role in cancer has begun to be studied [67]. For example, the NADH dehydrogenase (ubiquinone) 1 alpha subcomplex 13 is a gene known to be down-regulated in basal cell carcinomas [68]. This gene, also denominated *NDUFA13* or *GRIM19*, was initially identified as a pro-apoptotic gene mediating retinoid antitumor effects and indispensable for proper assembling and functioning of complex I of this pathway [69]. In addition, it has been demonstrated that NADH dehydrogenase plays an important role in generating ROS during doxorubicin treatment, and its down-regulation has been found in doxorubicin-resistant A431 cells [70]. This was one of the

two individual genes we assessed in the pre-and post-treatment biopsies by RT-PCR in a single patient corroborating the up-regulation observed in the microarray analysis.

Regarding down-regulated genes, in this work we solely point out that ATP-binding cassette, sub-family B (MDR/TAP), member 5 was down-regulated by hydralazine and magnesium valproate treatment. Interestingly, ABCB5 is a novel drug transporter and a chemoresistance mediator identified in human melanoma and instinctively present in a subset of chemoresistant, stem cell phenotype-expressing tumor cells among melanoma bulk populations, indicating that these chemoresistant cells can be specifically targeted via ABCB5 to enhance cytotoxic efficacy [69].

## Conclusion

In this proof-of-concept study, we demonstrate that treatment with hydralazine and magnesium valproate exerts its proposed molecular effects of DNA demethylation, HDAC inhibition, and gene reactivation in primary tumors of patients with breast cancer. Importantly, this doxorubicin- and cyclophosphamide-associated treatment is safe and well-tolerated, and appears to increase the efficacy of chemotherapy. A randomized phase III study is

ongoing to support the efficacy of the so-called epigenetic or transcriptional cancer therapy.

## SUPPORTING INFORMATION

### Table S1 Up-regulated genes

Found at: doi:10.1371/journal.pone.0000098.s001 (0.17 MB XLS)

### Table S2 Down-regulated genes

Found at: doi:10.1371/journal.pone.0000098.s002 (0.03 MB XLS)

## ACKNOWLEDGMENTS

### Author Contributions

Conceived and designed the experiments: AD CA CP. Performed the experiments: CP AG Ed AR AC CT EP LT MC. Analyzed the data: AD CA CP Ed AR AC TV MC MC. Contributed reagents/materials/analysis tools: AR TV. Wrote the paper: AD. Other: Clinical care of patients: CA EB PV TR ER.

## REFERENCES

- Zhu WG, Otterson GA (2003) The interaction of histone deacetylase inhibitors and DNA methyltransferase inhibitors in the treatment of human cancer cells. *Curr Med Chem Anti-Cancer Agents* 3: 187–199.
- Cameron EE, Bachman KE, Myohanen S, Herman JG, Baylin SB (1999) Synergy of demethylation and histone deacetylase inhibition in the re-expression of genes silenced in cancer. *Nat Genet* 21: 103–107.
- Li L, Shi H, Yiannoutsos C, Huang TH, Nephew KP (2005) Epigenetic hypothesis tests for methylation and acetylation in a triple microarray system. *J Comput Biol* 12: 370–390.
- Primeau M, Gagnon J, Momparler RL (2003) Synergistic antineoplastic action of DNA methylation inhibitor 5-AZA-2'-deoxycytidine and histone deacetylase inhibitor depsipeptide on human breast carcinoma cells. *Int J Cancer* 103: 177–184.
- Zhu WG, Lakshmanan RR, Beal MD, Otterson GA (2001) DNA methyltransferase inhibition enhances apoptosis induced by histone deacetylase inhibitors. *Cancer Res* 61: 1327–1333.
- Klisovic MI, Maghraby EA, Parthun MR, Guimond M, Sklenar AR, et al. (2003) Depsipeptide (FR 901228) promotes histone acetylation, gene transcription, apoptosis and its activity is enhanced by DNA methyltransferase inhibitors in AML1/ETO-positive leukemic cells. *Leukemia* 17: 350–358.
- Gagnon J, Shaker S, Primeau M, Hurtubise A, Momparler RL (2003) Interaction of 5-aza-2'-deoxycytidine and depsipeptide on antineoplastic activity and activation of 14-3-3sigma, E-cadherin and tissue inhibitor of metalloproteinase 3 expression in human breast carcinoma cells. *Anticancer Drugs* 14: 193–202.
- Bovenzi V, Momparler RL (2001) Antineoplastic action of 5-aza-2'-deoxycytidine and histone deacetylase inhibitor and their effect on the expression of retinoic acid receptor beta and estrogen receptor alpha genes in breast carcinoma cells. *Cancer Chemother Pharmacol* 48: 71–76.
- Gore SD, Baylin S, Sugar E, Carraway H, Miller CB, et al. (2006) Combined DNA methyltransferase and histone deacetylase inhibition in the treatment of myeloid neoplasms. *Cancer Res* 66: 6361–6369.
- García-Manero G, Kantarjian HM, Sánchez-González B, Yang H, Rosner G, et al. (2006) Phase I/II study of the combination of 5-aza-2'-deoxycytidine with valproic acid in patients with leukemia. *Blood*, Aug 1 [Epub ahead of print].
- Karagiannis TC, El-Osta A (2006) Modulation of cellular radiation responses by histone deacetylase inhibitors. *Oncogene* 25: 3885–3893.
- Kim MS, Blake M, Baek JH, Kohlhagen G, Pommier Y, et al. (2003) Inhibition of histone deacetylase increases cytotoxicity to anticancer drugs targeting DNA. *Cancer Res* 63: 7291–7300.
- Chávez-Blanco A, Pérez-Plasencia C, Pérez-Cárdenas E, Carrasco-Legleu C, Rangel-López E, et al. (2006) Antineoplastic effects of the DNA methylation inhibitor hydralazine and the histone deacetylase inhibitor valproic acid in cancer cell lines. *Cancer Cell Int* 6: 2.
- Kim MS, Blake M, Baek JH, Kohlhagen G, Pommier Y, Carrier F (2003) Inhibition of histone deacetylase increases cytotoxicity to anticancer drugs targeting DNA. *Cancer Res* 63: 7291–7300.
- Sonnemann J, Kumar KS, Heesch S, Muller C, Hartwig C, et al. (2006) Histone deacetylase inhibitors induce cell death and enhance the susceptibility to ionizing radiation, etoposide, and TRAIL in medulloblastoma cells. *Int J Oncol* 28: 755–766.
- Pérez-Plasencia C, Dueñas-González A (2006) Can the state of cancer chemotherapy resistance be reverted by epigenetic therapy? *Mol Cancer* 5: 27.
- Huang TH, Perry MR, Laux DE (1999) Methylation profiling of CpG islands in human breast cancer cells. *Hum Mol Genet* 8: 459–470.
- Yang X, Yan L, Davidson NE (2001) DNA methylation in breast cancer. *Endocr Relat Cancer* 8: 115–127.
- Mielnicki LM, Asch HL, Asch BB (2001) Genes, chromatin, and breast cancer: an epigenetic tale. *J Mammary Gland Biol Neoplasia* 6: 169–182.
- Shi H, Rahmatpanah F, Wei SH, Caldwell CW, Huang TH (2001) Dissecting complex epigenetic alterations in breast cancer using CpG island microarrays. *Cancer Res* 61: 8375–8380.
- Kaufman M, Hortobagyi GN, Goldhirsch A (2006) Recommendations from an International Expert Panel on the use of neoadjuvant (primary) systemic treatment of operable breast cancer: an update. *J Clin Oncol* 24: 1940–1949.
- van der Hage JA, van der Hage JA, van de Velde CJ, Julien JP, Tubiana-Hulin M, et al. (2001) Preoperative chemotherapy in primary operable breast cancer: results from the European Organization for Research and Treatment of Cancer Trial 10902. *J Clin Oncol* 19: 4224–4237.
- Fisher B, Fisher B, Brown A, Mamounas E (1997) Effect of preoperative chemotherapy on local regional disease in women with operable breast cancer: findings from National Surgical Adjuvant Breast and Bowel Project B-18. *J Clin Oncol* 15: 2483–2493.
- Scholl SM, Pierga J, Asselain B, et al. (1995) Breast tumor response to primary chemotherapy predicts local and distant control as well as survival. *Eur J Cancer* 31: 1969–1975.
- Kuerer HM, Newman LA, Smith TL (1999) Clinical course of breast cancer patients with complete pathologic primary tumor and axillary lymph node response to doxorubicin-based neoadjuvant chemotherapy. *J Clin Oncol* 17: 460–469.
- Castañeda-Hernández G, Falcón-Neri A, Herrera-Abarca A, Herrera JE, Flores-Murrieta FJ (1995) Determination of three acetylase phenotypes in a Mexican population using sulfamethazine metabolic ratio. *Am J Ther* 2: 57–60.
- Sandoval Guerrero K, Revilla Vázquez A, Segura-Pacheco B, Dueñas-González A (2005) Determination of 5-methyl-cytosine and cytosine in tumor DNA samples of cancer patients. *Electrophoresis* 26: 1057–1062.
- Chávez-Blanco A, Segura-Pacheco B, Pérez-Cárdenas E, Taja-Chayeb L, Cetina L, et al. (2005) Histone acetylation and histone deacetylase activity of magnesium valproate in tumor and peripheral blood of patients with cervical cancer. A phase I study. *Mol Cancer* 4: 22.
- Reece PA, Cozamanis I, Zcest R (1980) Selective high-performance liquid chromatographic assays for hydralazine and its metabolites in plasma of man. *J Chromatogr* 181: 427–440.
- Sturn A, Quaknebusch J, Trajanoski Z (2002) Genesis: cluster analysis of microarray data. *Bioinformatics* 18: 207–208.
- Tusher VG, Tibshirani R, Chu G (2001) Significance analysis of microarrays applied to the ionizing radiation response. *Proc Natl Acad Sci U S A* 98: 5116–5121.
- Mauri D, Pavlidis N, Ioannidis JPA (2005) Neoadjuvant versus adjuvant systemic treatment in breast cancer: a meta analysis. *J Natl Cancer Inst* 97: 188–194.
- Scholl SM, Fourquet A, Asselain B (1994) Neoadjuvant versus adjuvant chemotherapy in premenopausal patients with tumours considered too large for

- breast conserving surgery: preliminary results of a randomised trial. *Eur J Cancer* 5: 645–652.
34. Schwartz GF, Birchansky CA, Komarnicky LT (1994) Induction chemotherapy followed by breast conservation for locally advanced carcinoma of the breast. *Cancer* 73: 362–369.
  35. Powles TJ, Hickish TF, Makris A (1995) Randomized trial of chemoendocrine therapy started before or after surgery for treatment of primary breast cancer. *J Clin Oncol* 13: 547–552.
  36. Brain E, Garrino C, Misset JL, Carbonero IG, Itzhaki M, et al. (1997) Long-term prognostic and predictive factors in 107 stage II/III breast cancer patients treated with anthracycline-based neoadjuvant chemotherapy. *Br J Cancer* 79: 1360–1367.
  37. Morrell LE, Lee YJ, Hurley J, et al. (1998) A phase II trial of neoadjuvant methotrexate, vinblastine, doxorubicin, and cisplatin in the treatment of patients with locally advanced breast carcinoma. *Cancer* 82: 503–511.
  38. Bonadonna G, Valagussa P, Brambilla C, et al. (1998) Primary chemotherapy in operable breast cancer: eight-year experience at the Milan Cancer Institute. *J Clin Oncol* 16: 93–100.
  39. Fernández-Sánchez M, Gamboa-Domínguez A, Uribe N, García-Ulloa AC, Flores-Estrada D, et al. (1998) Clinical and pathological predictors of the response to neoadjuvant anthracycline chemotherapy in locally advanced breast cancer. *Med Oncol* 23: 171–183.
  40. Rouzier R, Extra JM, Klijanienko J (2002) Incidence and prognostic significance of complete axillary downstaging after primary chemotherapy in breast cancer patients with T1 to T3 tumors and cytologically proven axillary metastatic lymph nodes. *J Clin Oncol* 20: 1304–1310.
  41. Rouzier R, Pusztai L, Delalage S, González-Angulo AM, Andre F, et al. (2005) Nomograms to predict pathologic complete response and metastasis-free survival after preoperative chemotherapy for breast cancer. *J Clin Oncol* 23: 8331–8339.
  42. Acharya S, Bussel JB (2000) Hematologic toxicity of sodium valproate. *J Pediatr Hematol Oncol* 22: 62–65.
  43. Bourg V, Lebrun C, Chlichmanian RM, Thomas P, Frenay M (2001) Nitrosourea-cisplatin-based chemotherapy associated with valproate: increase of haematologic toxicity. *Ann Oncol* 12: 217–219.
  44. Bug G, Gul H, Schwarz K, Pfeifer H, Kampfmann M, Zheng X, et al. (2005) Valproic acid stimulates proliferation and self-renewal of hematopoietic stem cells. *Cancer Res* 65: 2537–2541.
  45. Lesser JM, Israili ZH, Davis DC, Dayton PG (1974) Metabolism and disposition of hydralazine-14C in man and dog. *Drug Metab Dispos* 2: 351–360.
  46. Goffin J, Eisenhauer E (2002) DNA methyltransferase inhibitors- state of the art. *Ann Oncol* 13: 1699–716.
  47. Claus R, Almstedt M, Lubbert M (2005) Epigenetic treatment of hematopoietic malignancies: *in vivo* targets of demethylating agents. *Semin Oncol* 32: 511–520.
  48. Mai A, Massa S, Rotili D, Cerbara I, Valente S, et al. (2005) Histone deacetylation in epigenetics: an attractive target for anticancer therapy. *Med Res Rev* 25: 261–309.
  49. Segura-Pacheco B, Trejo-Becerril C, Pérez-Cárdenas E, Taja-Chayeb L, Mariscal I, et al. (2003) Reactivation of tumor suppressor genes by the cardiovascular drugs hydralazine and procainamide and their potential use in cancer therapy. *Clin Cancer Res* 9: 1596–1603.
  50. Angeles E, Vázquez-Valadez VH, Vázquez-Valadez O, Velázquez-Sánchez AM, Ramírez A, et al. (2005) Computational studies of 1-hydrazinophthalazine (hydralazine) as antineoplastic agent. Docking studies on methyltransferase. *Lett Drug Des Discov* 2: 282–286.
  51. Zambrano P, Segura-Pacheco B, Pérez-Cárdenas E, Cetina L, Revilla-Vázquez A, et al. (2005) A phase I study of hydralazine to demethylate and reactivate the expression of tumor suppressor genes. *BMC Cancer* 5: 44.
  52. Samlowski WE, Leachman SA, Wade M, Cassidy P, Porter-Gill P, et al. (2005) Evaluation of a 7-day continuous intravenous infusion of decitabine: inhibition of promoter-specific and global genomic DNA methylation. *J Clin Oncol* 23: 3897–3905.
  53. Tang B, Jiang J (2005) Study of the CpG methylation status of ER alpha gene in estrogen receptor alpha-negative breast cancer cell lines and the role of hydralazine demethylation. *Zhonghua Bing Li Xue Za Zhi* 34: 283–287.
  54. Gurvich N, Tsygankova OM, Meinkoth JL, Klein PS (2004) Histone deacetylase is a target of valproic acid-mediated cellular differentiation. *Cancer Res* 64: 1079–1086.
  55. Shi H, Wei SH, Leu YW, Rahmatpanah F, Liu JC, et al. (2003) Triple analysis of the cancer epigenome: an integrated microarray system for assessing gene expression, DNA methylation, and histone acetylation. *Cancer Res* 63: 2164–2171.
  56. Suzuki H, Gabrielson E, Chen W, Anbazhagan R, van Engeland M, Weijnenberg MP, Herman JG, Baylin SB (2002) A genomic screen for genes upregulated by demethylation and histone deacetylase inhibition in human colorectal cancer. *Nat Genet* 31: 141–149.
  57. Midlitch O, Prissack HB, Munnes M, Audretsch W, Bojar H (2004) Immediate gene expression changes after the first course of neoadjuvant chemotherapy in patients with primary breast cancer disease. *Clin Cancer Res* 10: 6418–6431.
  58. Buchholz TA, Stivers DN, Stec J, Ayers M, Clark E, et al. (2002) Global gene expression changes during neoadjuvant chemotherapy for human breast cancer. *Cancer J* 8: 461–468.
  59. Selivanova G, Kayastha G, Demidenko ZN, Vassilev LT, et al. (2005) Depletion of mutant p53 and cytotoxicity of histone deacetylase inhibitors. *Cancer Res* 65: 7386–7392.
  60. Kitazono M, Bates S, Fok P, Fojo T, Blagosklonny MV (2002) The histone deacetylase inhibitor FR901228 (desipeptide) restores expression and function of pseudo-null p53. *Cancer Biol Ther* 2: 665–668.
  61. Selivanova G, Kawasaki T, Ryabchenko L, Wiman KG (1998) Reactivation of mutant p53: a new strategy for cancer therapy. *Semin Cancer Biol* 8: 369–378.
  62. Cristofanilli M, Krishnamurthy S, Guerra L, Broglio K, Arun B, et al. (2006) A nonreplicating adenoviral vector that contains the wild-type p53 transgene combined with chemotherapy for primary breast cancer: safety, efficacy, and biologic activity of a novel gene-therapy approach. *Cancer* 107: 935–944.
  63. Karpf AR, Peterson PW, Rawlins JT, Dalley BK, Yang Q, et al. (1999) Inhibition of DNA methyltransferase stimulates the expression of signal transducer and activator of transcription 1, 2, and 3 genes in colon tumor cells. *Proc Natl Acad Sci U S A* 96: 14007–14012.
  64. Tomasi TB, Magner WJ, Khan AN (2006) Epigenetic regulation of immune escape genes in cancer. *Cancer Immunol Immunother* 55: 1159–1184.
  65. Gollob JA, Sciambi CJ, Peterson BL, Richmond T, Thoreson M, et al. (2006) Phase I trial of sequential low-dose 5-aza-2'-deoxycytidine plus high-dose intravenous bolus interleukin-2 in patients with melanoma or renal cell carcinoma. *Clin Cancer Res* 12: 4619–4627.
  66. Hartsough MT, Clare SE, Mair M, Elkahoul AG, Sgroi D, et al. (2001) Elevation of breast carcinoma Nm23-H1 metastasis suppressor gene expression and reduced motility by DNA methylation inhibition. *Cancer Res* 61: 2320–2327.
  67. Smeitink J, van den Heuvel L, DiMauro S (2001) The genetics and pathology of oxidative phosphorylation. *Nat Rev Genet* 2: 342–352.
  68. Mamelak AJ, Kowalski J, Murphy K, Yadava N, Zahurak M, et al. (2005) Downregulation of NDUFA1 and other oxidative phosphorylation-related genes is a consistent feature of basal cell carcinoma. *Exp Dermatol* 14: 336–348.
  69. Huang G, Lu H, Hao A, Ng DC, Ponniah S, et al. (2004) GRIM-19, a cell death regulatory protein, is essential for assembly and function of mitochondrial complex I. *Mol Cell Biol* 24: 8447–8456.
  70. Wong TW, Yu HY, Kong SK, Fung KP, Kwok TT (2000) The decrease of mitochondrial NADH dehydrogenase and drug induced apoptosis in doxorubicin resistant A431 cells. *Life Sci* 67: 1111–1118.
  71. Frank NY, Margaryan A, Huang Y, Schatton T, Waaga-Gasser AM, et al. (2005) ABCB5-mediated doxorubicin transport and chemoresistance in human malignant melanoma. *Cancer Res* 65: 4320–4333.
