# Supplementary material for: A Proof-Of-Principle Study of Epigenetic Therapy Added to Neoadjuvant Doxorubicin Cyclophosphamide for Locally Advanced Breast Cancer
Source: PLoS One. 2006 Dec 20;1(1):e98. doi: 10.1371/journal.pone.0000098 (PMC1762324; doi:10.1371/journal.pone.0000098)
Supplement: Table S2 — Down-regulated genes (0.03 MB XLS) [file pone.0000098.s002.xls]

## Sheet: Hoja1
Acc	UGCluster	Name	Symbol
AI798899	Hs.148448	Transcribed locus
NM_025165	Hs.631710	Elongation factor RNA polymerase II-like 3	ELL3
NM_005332	Hs.585357	Hemoglobin, zeta	HBZ
CA950745	Hs.560811	Transcribed locus
CB305901	Hs.573661	Transcribed locus
AK094942	Hs.109655	Sex comb on midleg-like 1 (Drosophila)	SCML1
NM_005863	Hs.25155	Neuroepithelial cell transforming gene 1	NET1
NM_006884	Hs.55967	Short stature homeobox 2	SHOX2
NM_003006	Hs.591014	Selectin P ligand	SELPLG
H04623	Hs.78036	Solute carrier family 6 (neurotransmitter transporter, noradrenalin), member 2	SLC6A2
AA161380	Hs.368367	CCCTC-binding factor (zinc finger protein)	CTCF
NM_004829	Hs.97084	Natural cytotoxicity triggering receptor 1	NCR1
NM_001006606	Hs.542766	Hypothetical LOC388882	LOC388882
AI683534	Hs.491813	Carbonic anhydrase VIII	CA8
BQ184842	Hs.633120	Transcribed locus
NM_012344	Hs.131138	Neurotensin receptor 2	NTSR2
BC035176	Hs.385614	CDNA clone IMAGE:5266012
AI016724	Hs.489051	Six transmembrane epithelial antigen of the prostate 2	STEAP2
BC031939	Hs.127775	CDNA clone IMAGE:4827062
AA418966	Hs.404102	ATP-binding cassette, sub-family B (MDR/TAP), member 5	ABCB5
NM_001140	Hs.73809	Arachidonate 15-lipoxygenase	ALOX15
AI733173	Hs.561791	Transcribed locus
AI393462	Data not found
AA573860	Hs.488007	Acyloxyacyl hydrolase (neutrophil)	AOAH
AF001893	Hs.523789	Trophoblast-derived noncoding RNA	TncRNA
AK091593	Hs.12513	Hypothetical protein LOC157627	LOC157627
BQ276715	Hs.282665	Nudix (nucleoside diphosphate linked moiety X)-type motif 7	NUDT7
NM_005160	Hs.571835	Adrenergic, beta, receptor kinase 2	ADRBK2
NM_000911	Hs.372	Opioid receptor, delta 1	OPRD1
BQ012761	Hs.619447	Transcribed locus
NM_006821	Hs.446685	Acyl-CoA thioesterase 2	ACOT2
BC015846	Hs.526761	Homo sapiens, clone IMAGE:4618125, mRNA
BX108089	Hs.571183	Transcribed locus, strongly similar to XP_518680.1 PREDICTED: similar to FLJ00109 protein [Pan troglodytes]
AI912014	Hs.212492	Transcribed locus
NM_031886	Hs.306973	Potassium voltage-gated channel, shaker-related subfamily, member 7	KCNA7
BQ025727	Hs.191591	HSPC324
NM_015681	Hs.462445	B9 protein	EPPB9
BM152952	Hs.620879	Transcribed locus
AA862450	Hs.127054	Transcribed locus
AK094433	Hs.207528	HLA complex group 22	HCG22
BC039159	Hs.623827	Homo sapiens, clone IMAGE:4747087, mRNA
AA582073	Hs.634459	Transcribed locus
AI688492	Hs.635626	Transcribed locus
BX107348	Hs.560292	Transcribed locus
CA314870	Hs.443406	Transcribed locus
AA663453	Hs.173705	HCV F-transactivated protein 1	LOC401152
AW573115	Hs.551196	Transcribed locus, weakly similar to XP_522146.1 PREDICTED: melatonin receptor 1B [Pan troglodytes]
AW193666	Hs.305985	Polyhomeotic-like 1 (Drosophila)	PHC1
AL137390	Hs.116324	MRNA; cDNA DKFZp434P0626 (from clone DKFZp434P0626)
AA952985	Data not found
AI765121	Hs.53454	Topoisomerase (DNA) II binding protein 1	TOPBP1
NM_003801	Hs.627962	Glycosylphosphatidylinositol anchor attachment protein 1 homolog (yeast)	GPAA1
AV723362	Hs.603236	Transcribed locus
N90707	Hs.54647	Transcribed locus, weakly similar to NP_060312.1 hypothetical protein FLJ20489 [Homo sapiens]
AW291402	Hs.282787	Forkhead box P2	FOXP2
NM_003125	Hs.1076	Small proline-rich protein 1B (cornifin)	SPRR1B
NM_002909	Hs.49407	Regenerating islet-derived 1 alpha (pancreatic stone protein, pancreatic thread protein)	REG1A
AI362666	Hs.214491	Transcribed locus
NM_173509	Hs.400696	Chromosome 1 open reading frame 76	C1orf76
AV699295	Hs.529351	Tripartite motif-containing 61	TRIM61
BC041468	Hs.434746	Hypothetical protein LOC339988	LOC339988
NM_000518	Hs.523443	Hemoglobin, beta	HBB
NM_003036	Hs.642701	V-ski sarcoma viral oncogene homolog (avian)	SKI
BX104546	Hs.113940	KIAA1505 protein	KIAA1505
BC062348	Hs.640271	Chromosome 14 open reading frame 167	C14orf167
NM_000588	Hs.694	Interleukin 3 (colony-stimulating factor, multiple)	IL3
NM_153003	Hs.532138	Orofacial cleft 1 candidate 1	OFCC1
NM_021826	Hs.129448	U-box domain containing 5	UBOX5
NM_019024	Hs.591564	KIAA1414 protein	KIAA1414
BF308913	Hs.55977	Hypothetical protein MGC16291	MGC16291
AA830178	Hs.373818	Neighbor of BRCA1 gene 1	NBR1
AI825725	Hs.369924	NHL repeat containing 2	NHLRC2
BQ892326	Data not found
NM_002274	Hs.2785	Keratin 17	KRT17
AW474389	Hs.535896	HEAT repeat containing 2	HEATR2
AI590938	Hs.12970	Proteasome (prosome, macropain) 26S subunit, non-ATPase, 3	PSMD3
AA999790	Hs.129613	Transcribed locus
AK023341	Hs.592288	Pre-B-cell colony enhancing factor 1	PBEF1
AV649626	Hs.282376	Ribosomal protein S4, Y-linked 1	RPS4Y1
BM991954	Hs.609869	Similar to cadherin 12, type 2 preproprotein	LOC643998
AW270388	Hs.335551	Dihydrolipoamide S-acetyltransferase (E2 component of pyruvate dehydrogenase complex)	DLAT
NM_005987	Hs.46320	Small proline-rich protein 1A	SPRR1A
BF510074	Hs.320151	1-acylglycerol-3-phosphate O-acyltransferase 2 (lysophosphatidic acid acyltransferase, beta)	AGPAT2
BU727096	Hs.596885	Transcribed locus
NM_000558	Hs.449630	Hemoglobin, alpha 1	HBA1
AF090945	Hs.612037	Clone HQ0670
NM_000632	Hs.172631	Integrin, alpha M (complement component 3 receptor 3 subunit)	ITGAM
AI762582	Hs.370473	Zinc finger protein 18	ZNF18
NM_002964	Hs.416073	S100 calcium binding protein A8 (calgranulin A)	S100A8
